# Supplementary material for: Surface Properties of Aqueous Dispersions of Bovine Serum Albumin Fibrils
Source: MDPI journal article supplement (doi:10.3390/colloids7030059), 2023-09-14
Supplement: s1 [file s1]

# Supporting Information

Article

## Surface properties of aqueous dispersions of bovine serum albumin fibrils

Alexander Akentiev<sup>1</sup>, Shi-Yow Lin<sup>2</sup>, Giuseppe Loglio<sup>3</sup>, Reinhard Miller<sup>4</sup> and Boris Noskov<sup>1,\*</sup>

- <sup>1</sup> Department of Colloid Chemistry, St. Petersburg State University, Universitetsky pr. 26, 198504 St. Petersburg, Russia; a.akentiev@spbu.ru  
<sup>2</sup> Chemical Engineering Department, National Taiwan University of Science and Technology, Taipei 106, Taiwan; sylin@mail.ntust.edu.tw  
<sup>3</sup> Institute of Condensed Matter Chemistry and Technologies for Energy, 16149 Genoa, Italy; giuseppe.loglio@ge.icmate.cnr.it  
<sup>4</sup> Institute for Condensed Matter Physics, Technical University Darmstadt, 64289 Darmstadt, Germany; miller@fkp.tu-darmstadt.de  
\* Correspondence: borisanno@rambler.ru; Tel.: +78124284093

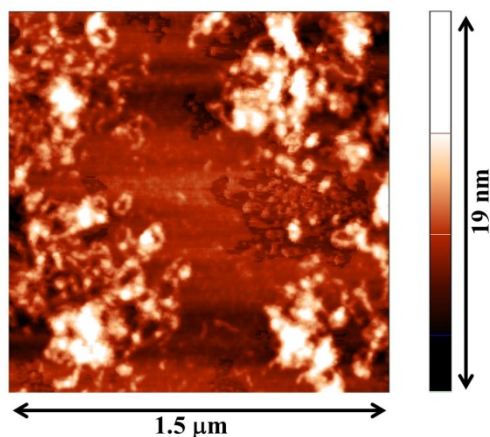

Figure S1. AFM-image of a droplet of fibril dispersions after dilution by 200 times in TrisHCl buffer solution after purification.

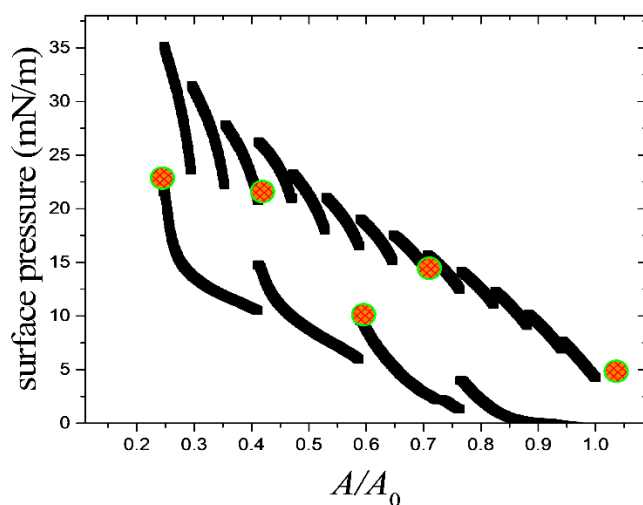

Figure S2. Compression-expansion isotherms of a spread layer of fibril dispersion on an aqueous solution of 0.1 M NaCl. Circles mark the places where the layer was transferred onto a mica plate. A<sub>0</sub> – the initial surface area (A – is the area between barriers at the given moment, cf. Eq. on page 3 of the manuscript).

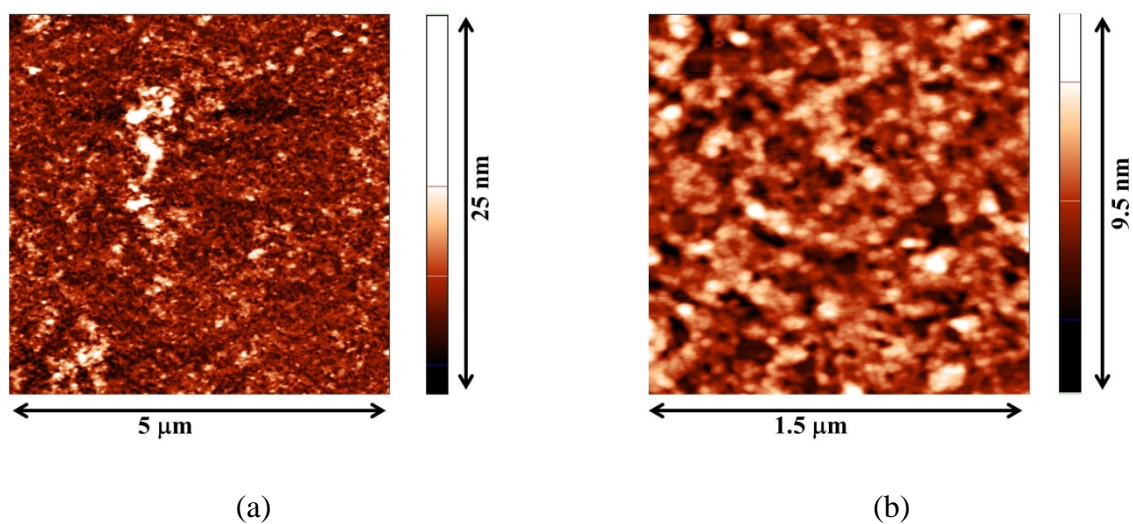

Figure S3. AFM images of spread layers of BSA fibrils transferred from the surface of a 0.1 M NaCl aqueous solution onto mica plates at the surface expansion to surface pressure of 10 mN/m.

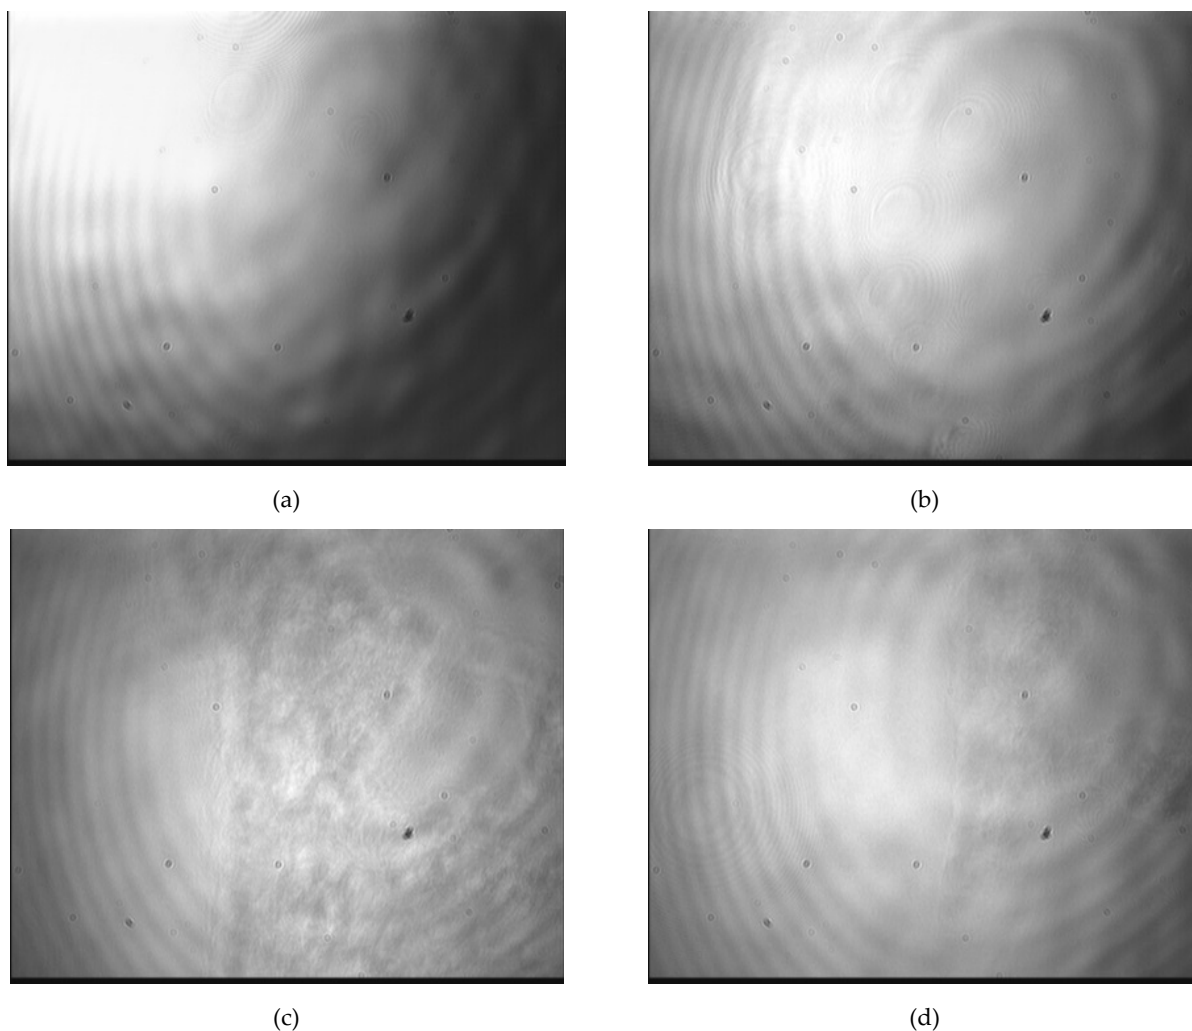

Figure S4. BAM-images of spread layers of BSA fibrils on the surface of 0.1 M NaCl aqueous solution at different degrees of surface compression-expansion: a) before compression; b) twofold compression; c) twofold expansion after an external mechanical disturbance; d) in ten minutes after the disturbance. Image size is 1 X 0.82 mm.
